# Supplementary material for: Monosomal karyotype and chromosome 17p loss or TP53 mutations in decitabine-treated patients with acute myeloid leukemia
Source: Springer Nature journal article supplement (doi:10.1007/s00277-020-04082-7), 2020-06-06
Supplement: MOESM1 [file 18056434]

## Supplemental Information

Heiko Becker, Dietmar Pfeifer, Gabriele Ihorst, et al. Monosomal karyotype and chromosome 17p loss or TP53 mutations in decitabine-treated patients with acute myeloid leukemia

## Supplemental Methods

### Derivation of the genetic clonal architecture

The proportion of cells harboring distinct mutations was estimated by multiplying the VAF by 2 (to a maximum of 100%) assuming a heterozygous state of the mutation. For mutations with a VAF >60%, affected by a deletion or monosomy (as concluded from cytogenetics) or located on chr X in male patients a heterozygous state could not be assumed and, thus, the VAF was considered to be similar to the number of affected cells. For mutations located on chromosomes affected by a trisomy, the clonal architecture was evaluated by multiplying the VAF by 1.5 and 3, under the assumption that the mutated or wild-type allele was gained, respectively. Only samples with encompassing cytogenetic data or cases with only one mutation identified were considered. Cytogenetic aberrations were not considered clone-defining events, due to the generally low number and the processing of cells analyzed by metaphase cytogenetics. Mutations that were present in a proportion of cells that was by >20% smaller than the mutation with the highest VAF were considered to have been acquired later during disease course. Mutations with  $\leq 20\%$  difference in the proportion of cells affected were concluded to be present in the same clone. Mutations in minor subclones were present in a proportion of cells that was by >20% different than the mutation with the lowest VAF in the major clone.

**Prediction of DNA copy number variations from NGS data**

We attempted to retrieve data on chr17 copy number variations (CNV) based on the sequencing data in patients without cytogenetic information and without a *TP53* gene mutation using the CNVPanelizer (Oliveira C and Wolf, T; R package version 1.4.0), but we were not able to reliably derive such data. Briefly, the amplicons representing a gene according to the manufacturer's TruSight Myeloid Targeted Regions BED File were used as input for the CNVPanelizer algorithm. PCR duplicates were not removed and bootstrapping and background methods were repeated 10,000 times. In order to evaluate this approach for the identification of CNVs based on the available NGS data, data from samples with normal karyotype (based on metaphase cytogenetics) were compared with data from samples with -17. The results obtained by the algorithm based on the NGS data did not match the data from the metaphase cytogenetics. Thus, we concluded that the density of data points of the available NGS data is not sufficient to reliably predict CNV.

**Supplemental Table S1. Karyotypes with a loss of 17p aberration**

| Pat | Karyotype                                                                                                                                                                                  | CK | MK |
|-----|--------------------------------------------------------------------------------------------------------------------------------------------------------------------------------------------|----|----|
| 1*  | 46,XY,del(20)(q1?3.1)[2]/44~45,X,-Y,del(5)(q31),der(6)?t(1;6)(q25;q21),der(16;17)(q10;q10),add(17)(p1?),del(20)(q1?3.1),+mar,inc[cp18]                                                     | +  | -  |
| 2*  | 55-56,XY,+Y,+r(4),dic(5;17)(q13;p11),+8,+9,+11,+13,+14,+18,+20,+der(22)t(11;22)(q14;p11)[5]                                                                                                | +  | -  |
| 3*  | 48,XY,der(2)t(1;2)(p11;p25),der(3;12)(q10;q10),dic(5;17)(q11;p11),+8,+21<br>[8]/46,XY,der(2)t(1;2)(p11;p26),der(2;12)(q10;q10),dic(5;17)(q11;p11),der(15)ins(15;22)(q22;q?q?)[3]/46,XY [1] | +  | -  |
| 4*  | 46,XX,del(5)(q13q33)[2]/44,XX,del(5)(q13q33),-7,-16,-17,+mar [26]/46,XX [2]                                                                                                                | +  | +  |
| 5*  | 44-46,XY,del(2)(p13),der(3)(q21),del(5)(q13q33),del(7)(q22q32),del(13)(q14q22),-15,-16,-17,-18,del(20)(q11),+?21,+1-3mar,inc[cp17]/46,XY[5]                                                | +  | +  |
| 6   | 52,XX,+del(1)(q24),del(5)(q13q33),del(7)(q21q32),+11,+13,+14,+16,-17,+21,+22 [7]                                                                                                           | +  | +  |
| 7   | 46,XX,del(5)(q13q33),der(16)del(16)(p11)del(16)(q22),-17,der(20)t(17;20)(q11;q11),+der(20) [17]                                                                                            | +  | +  |
| 8   | 42,XX,inv(3)(q21q26.2),del(5)(q13q33),-7,-11,-14,add(14)(p11),-17,der(17;18)(p10;q10),-18,+mar [16]                                                                                        | +  | +  |
| 9   | -41,XY,add(1)(q32),-3,-5,-7,-12,del(16)(q22),-17,-18,del(20)(q11q13),+mar, dmin (matrix CGH)                                                                                               | +  | +  |
| 10  | 39-41(XY),-Y,del(4)(q11),der(3)t(3;5)(p21;?)t(5;17),der(5)t(5;17)(q31;q11),-8,der(11)t(3;11)(p21;q23),der(14;15;21;21),+16,-17,del(20)(q11),+21[cp15]                                      | +  | +  |
| 11  | 47-48,XX,del(3)(p11p14),-5,del(6)(p22),+del(6)(p22),-7,+8,+11,add(17)(p11),-18,add(22)(q11),+1-2mar [20]                                                                                   | +  | +  |
| 12  | 45,XY,del(3)(p21),-5,-7,del(10)(q22),der(12;22)(q10;q10),+13,del(17)(p11) [15]                                                                                                             | +  | +  |
| 13  | 42,XY,der(?)t(3;?)(q21;?),del(5)(q11q22),der(8),ish 8q22(ETO-),trp(11)(q13q23),-16,-17,del(20)(q11),der(21),inc [cp7]/46,XY [1]                                                            | +  | +  |
| 14  | 46,XX,del(5)(q13q31)[9]/46,XX,del(5)(q13q31),del(17)(p11)[11]                                                                                                                              | -  | -  |
| 15  | 46,XY,der(5;17)(p10;q10),-17,-18,add(19)(p13),+21,+mar [23]                                                                                                                                | +  | +  |
| 16  | 45,XX,del(5)(q13q33),-7,-17,+mar [12]/45,XX,del(5)(q13q33),-7,i(8)(q1 0),-17,+mar [7]                                                                                                      | +  | +  |
| 17  | 45-46,XX,-2,-4,-5,add(7)(q?22),add(12)(p1?),-?14,-?15,-17,+5-6mar,inc[cp6]                                                                                                                 | +  | +  |
| 18  | 46,XX,der(5;13)(p10;q10),add(17)(p13),+19,-20 [10]/46,XX [1]                                                                                                                               | +  | +  |
| 19  | 53-57,XY,+1,add(1)(q23),dic(1;11)(q11;p11),+2,add(2)(q37),add(2)(q21),der(2;7)(p10;q10),add(7)(q11),+8,+9,+10,+11,+13,+15,-17,+20,add(21)(q22),+22,+3mar [cp20]                            | +  | +  |
| 20  | 43-45,XY,add(1)(q10),add(4)(p12),-5,add(6)(q13),-7,add(9)(q34),add(12)(p11),-15,-17,-20,+2-4mar [9]                                                                                        | +  | +  |
| 21  | 44,XX,-2,-5,+8,-10,-12,der(14)t(14;15),(q22;q15),-15,-17,add(22)(q11),+3mar [7]/45,XX,add(2)(q11),-5,+8,-10,-12,der(14)t(14;15)(q22;q15),-15,-17,add(22)(q11),+3mar [3]                    | +  | +  |
| 22  | 45,XY,-9,add(17)(p13),del(20)(q11) [11]                                                                                                                                                    | +  | +  |
| 23  | 43-49,XY,der(3),del(5)(q),-14,-15,-17,-18,-20,+21,+1-5mar [cp8]                                                                                                                            | +  | +  |
| 24  | 46,XX [1]/45,X,-X,add(5)(q11),-17,add(18)(q?22),-21,+mar,+mar [22]                                                                                                                         | +  | +  |
| 25  | 46,XY,inv(3)(q21q26.2),del(6)(q12q23),dup(7)(q11q21),del(7)(q22),-17,+mar [7]/46,XY[4]                                                                                                     | +  | +  |

Abbreviations: Pat, patient; CK, complex karyotype; MK, monosomal karyotype; n.a., not applicable; n.d., not determined

\* Patient numbers correspond to numbers in Figure 1

**Supplemental Table S2.** Gene mutations identified by panel sequencing

| Pat | Gene   | Chr      | Nucleotide change                     | AA change      | VAF | Major clone (M) vs minor subclones (m) |
|-----|--------|----------|---------------------------------------|----------------|-----|----------------------------------------|
| 16  | TP53   | 17p13.1  | c.365_366delTG                        | p.V122fs*26    | 44% | M                                      |
| 16  | TP53   | 17p13.1  | c.734G>C                              | p.G245A        | 37% | M                                      |
| 16  | PTPN11 | 12q24.13 | c.218C>T                              | p.T73I         | 32% | M                                      |
| 17  | TP53   | 17p13.1  | c.524G>A                              | p.R175H        | 38% | M                                      |
| 18  | TP53   | 17p13.1  | c.707A>G                              | p.Y236C        | 81% | M                                      |
| 18  | DNMT3A | 2p23.3   | c.1220T>C                             | p.I407T        | 45% | M                                      |
| 18  | KIT    | 4q12     | c.2447A>T                             | p.D816V        | 17% | m                                      |
| 18  | PTPN11 | 12q24.13 | c.182A>G                              | p.D61G         | 11% | m                                      |
| 19  | TP53   | 17p13.1  | c.747G>C                              | p.R249S        | 57% | M                                      |
| 19  | ABL1   | 9q34.12  | c.613G>A                              | p.V205I        | 44% | M                                      |
| 20  | JAK2   | 9p24.1   | c.1624_1629delAATGAA                  | p.N542_E543del | 55% | M                                      |
| 20  | TP53   | 17p13.1  | c.524G>A                              | p.R175H        | 50% | M                                      |
| 21  | BCOR   | Xp11.4   | c.4537C>T                             | p.R1513*       | 87% | M                                      |
| 21  | TP53   | 17p13.1  | c.308dupA                             | p.Y103*        | 75% | M                                      |
| 22  | TP53   | 17p13.1  | c.535C>T                              | p.H179Y        | 21% | M                                      |
| 22  | DNMT3A | 2p23.3   | c.2645G>A                             | p.R882H        | 17% | M                                      |
| 22  | FLT3   | 13q12.2  | c.2503G>T                             | p.D835Y        | 12% | M                                      |
| 23  | TP53   | 17p13.1  | c.1018delA                            | p.M340fs*5     | 21% | M                                      |
| 24  | EZH2   | 7q36.1   | c.1355dupA                            | p.Y452*        | 81% | M                                      |
| 24  | ASXL1  | 20q11.21 | c.1934dupG                            | p.G646Wfs*12   | 36% | M                                      |
| 25  | ZRSR2  | Xp22.2   | c.515dupG                             | p.C172Wfs*6    | 89% | M                                      |
| 25  | RUNX1  | 21q22.12 | c.328A>C                              | p.K110Q        | 52% | M                                      |
| 25  | ASXL1  | 20q11.21 | c.2302C>T                             | p.Q768*        | 51% | M                                      |
| 25  | ASXL1  | 20q11.21 | c.3306G>T                             | p.E1102D       | 51% | M                                      |
| 25  | EZH2   | 7q36.1   | c.907+2T>C                            | splicing       | 49% | M                                      |
| 25  | RUNX1  | 21q22.12 | c.496C>G                              | p.R166G        | 45% | M                                      |
| 25  | FLT3   | 13q12.2  | c.2533A>G                             | p.R845G        | 25% | m                                      |
| 25  | FLT3   | 13q12.2  | c.1775T>A                             | p.V592D        | 6%  | m                                      |
| 25  | EZH2   | 7q36.1   | c.1307A>G                             | p.E436G        | 46% | M                                      |
| 26  | EZH2   | 7q36.1   | c.1583G>C                             | p.C528S        | 85% | M                                      |
| 26  | RUNX1  | 21q22.12 | c.482T>A                              | p.L161H        | 47% | M                                      |
| 26  | KRAS   | 12p12.1  | c.34G>A                               | p.G12S         | 46% | M                                      |
| 26  | ASXL1  | 20q11.21 | c.2077C>T                             | p.R693*        | 43% | M                                      |
| 27  | SRSF2  | 17q25.1  | c.283C>G                              | p.P95A         | 47% | M                                      |
| 27  | EZH2   | 7q36.1   | c.2080C>T                             | p.H694Y        | 46% | M                                      |
| 27  | EZH2   | 7q36.1   | c.73C>T                               | p.R25*         | 46% | M                                      |
| 27  | IDH1   | 2q34     | c.394C>T                              | p.R132C        | 45% | M                                      |
| 27  | RUNX1  | 21q22.12 | c.500G>C                              | p.S167T        | 44% | M                                      |
| 27  | ASXL1  | 20q11.21 | c.1934dupG                            | p.G646Wfs*12   | 33% | m                                      |
| 28  | RUNX1  | 21q22.12 | c.965C>G                              | p.S322*        | 40% | M                                      |
| 28  | BCOR   | Xp11.4   | c.2893A>T                             | p.R965*        | 38% | M                                      |
| 28  | STAG2  | Xq25     | c.1876dupA                            | p.T626Nfs*9    | 38% | M                                      |
| 28  | GATA2  | 3q21.3   | c.253_256dupTGCC                      | p.R86Lfs*100   | 35% | M                                      |
| 28  | PHF6   | Xq26.2   | c.821G>A                              | p.R274Q        | 33% | M                                      |
| 28  | ASXL1  | 20q11.21 | c.1934dupG                            | p.G646Wfs*12   | 32% | M                                      |
| 29  | TET2   | 4q24     | c.5122delA                            | p.S1708fs*11   | 47% | M                                      |
| 29  | KRAS   | 12p12.1  | c.34G>C                               | p.G12R         | 39% | M                                      |
| 29  | ASXL1  | 20q11.21 | c.1934dupG                            | p.G646Wfs*12   | 36% | M                                      |
| 30  | STAG2  | Xq25     | c.646C>T                              | p.R216*        | 82% | M                                      |
| 30  | IDH2   | 15q26.1  | c.419G>A                              | p.R140Q        | 45% | M                                      |
| 30  | ASXL1  | 20q11.21 | c.2278C>T                             | p.Q760*        | 41% | M                                      |
| 31  | SRSF2  | 17q25.1  | c.284C>T                              | p.P95L         | 54% | M                                      |
| 31  | IDH1   | 2q34     | c.394C>T                              | p.R132C        | 49% | M                                      |
| 31  | RUNX1  | 21q22.12 | c.610C>T                              | p.R204*        | 45% | M                                      |
| 31  | ASXL1  | 20q11.21 | c.1900_1922delIAGAGAGGCGCCACCACTGCCAT | p.E635Rfs*15   | 42% | M                                      |
| 31  | WT1    | 11p13    | c.1390G>A                             | p.D464N        | 30% | m                                      |
| 32  | RUNX1  | 21q22.12 | c.318G>C                              | p.W106C        | 81% | M                                      |
| 32  | IDH2   | 15q26.1  | c.419G>A                              | p.R140Q        | 45% | M                                      |
| 32  | SRSF2  | 17q25.1  | c.284C>G                              | p.P95R         | 43% | M                                      |
| 32  | FLT3   | 13q12.2  | c.1727T>C                             | p.L576P        | 33% | m                                      |
| 32  | ASXL1  | 20q11.21 | c.1934dupG                            | p.G646Wfs*12   | 32% | m                                      |
| 33  | CBL    | 11q23.3  | c.1268T>A                             | p.I423N        | 92% | M                                      |
| 33  | SRSF2  | 17q25.1  | c.284C>A                              | p.P95H         | 48% | M                                      |
| 33  | TET2   | 4q24     | c.1123G>T                             | p.E375*        | 45% | M                                      |
| 33  | TET2   | 4q24     | c.3732_3733delCT                      | p.Y1245Lfs*22  | 45% | M                                      |
| 33  | RAD21  | 8q24.11  | c.1681C>T                             | p.Q561*        | 43% | M                                      |
| 33  | RUNX1  | 21q22.12 | c.1090_1103delATCGGCATCGGCAT          | p.I364Vfs*231  | 43% | M                                      |
| 33  | ASXL1  | 20q11.21 | c.1772dupA                            | p.Y591*        | 38% | M                                      |
| 34  | SRSF2  | 17q25.1  | c.284C>T                              | p.P95L         | 41% | n.a.                                   |
| 34  | IDH1   | 2q34     | c.394C>A                              | p.R132S        | 36% | n.a.                                   |
| 34  | ASXL1  | 20q11.21 | c.1934dupG                            | p.G646Wfs*12   | 28% | n.a.                                   |
| 35  | SRSF2  | 17q25.1  | c.284C>A                              | p.P95H         | 54% | n.a.                                   |
| 35  | IDH2   | 15q26.1  | c.419G>A                              | p.R140Q        | 51% | n.a.                                   |
| 35  | ASXL1  | 20q11.21 | c.2708C>A                             | p.S903*        | 49% | n.a.                                   |
| 36  | SRSF2  | 17q25.1  | c.284C>T                              | p.P95L         | 49% | n.a.                                   |
| 36  | ASXL1  | 20q11.21 | c.2290delC                            | p.L764Yfs*8    | 46% | n.a.                                   |

|    |        |          |                                                                    |                                |      |      |
|----|--------|----------|--------------------------------------------------------------------|--------------------------------|------|------|
| 36 | GATA2  | 3q21.3   | c.1163_1168delITGAAGA                                              | p.M388_K389del                 | 46%  | n.a. |
| 36 | NRAS   | 1p13.2   | c.35G>A                                                            | p.G12D                         | 31%  | n.a. |
| 36 | NRAS   | 1p13.2   | c.182A>G                                                           | p.Q61R                         | 16%  | n.a. |
| 36 | WT1    | 11p13    | c.1137_1141dupACGGT                                                | p.S381Yfs*70                   | 8%   | n.a. |
| 37 | EZH2   | 7q36.1   | c.2051G>A                                                          | p.R684H                        | 83%  | M    |
| 37 | DNMT3A | 2p23.3   | c.1240T>G                                                          | p.F414V                        | 48%  | M    |
| 37 | TET2   | 4q24     | c.679G>T                                                           | p.E227*                        | 46%  | M    |
| 37 | SF3B1  | 2q33.1   | c.1986C>A                                                          | p.H662Q                        | 41%  | M    |
| 37 | FLT3   | 13q12.2  | c.2503G>T                                                          | p.D835Y                        | 23%  | m    |
| 37 | CBL    | 11q23.3  | c.1111T>G                                                          | p.Y371D                        | 7%   | m    |
| 38 | BCOR   | Xp11.4   | c.4266dupT                                                         | p.I1423Yfs*4                   | 32%  | n.a. |
| 38 | STAG2  | Xq25     | c.3085C>T                                                          | p.Q1029*                       | 26%  | n.a. |
| 38 | DNMT3A | 2p23.3   | c.2225G>C                                                          | p.R742P                        | 17%  | n.a. |
| 38 | CEBPA  | 19q13.11 | c.868G>T                                                           | p.E290*                        | 16%  | n.a. |
| 38 | SF3B1  | 2q33.1   | c.1874G>T                                                          | p.R625L                        | 16%  | n.a. |
| 38 | DNMT3A | 2p23.3   | c.490G>A                                                           | p.E164K                        | 11%  | n.a. |
| 38 | RUNX1  | 21q22.12 | c.772G>A                                                           | p.A258T                        | 7%   | n.a. |
| 39 | DNMT3A | 2p23.3   | c.2635A>G                                                          | p.N879D                        | 34%  | M    |
| 39 | PHF6   | Xq26.2   | c.946A>T                                                           | p.N316Y                        | 32%  | M    |
| 39 | STAG2  | Xq25     | c.328C>T                                                           | p.R110*                        | 26%  | M    |
| 39 | IDH2   | 15q26.1  | c.419G>A                                                           | p.R140Q                        | 25%  | M    |
| 39 | BCORL1 | Xq26.1   | c.4685G>T                                                          | p.S1562I                       | 22%  | M    |
| 39 | BCOR   | Xp11.4   | c.1005dupC                                                         | p.S336fs*45                    | 19%  | M    |
| 40 | BCORL1 | Xq26.1   | c.2715_2716insCC                                                   | p.K906Pfs*20                   | 30%  | M    |
| 40 | IKZF1  | 7p12.2   | c.482T>C                                                           | p.L161P                        | 28%  | M    |
| 41 | NPM1-B | 5q35.1   | c.863_864insCATG                                                   | p.W288fs*12                    | 32%  | M    |
| 41 | KDM6A  | Xp11.3   | c.1063C>T                                                          | R355*                          | 27%  | M    |
| 41 | FLT3   | 13q12.2  | c.2516A>C                                                          | p.D839A                        | 23%  | M    |
| 41 | IDH2   | 15q26.1  | c.419G>A                                                           | p.R140Q                        | 14%  | M    |
| 41 | FLT3   | 13q12.2  | c.2533A>G                                                          | p.R845G                        | 10%  | M    |
| 42 | DNMT3A | 2p23.3   | c.1019delG                                                         | p.C340Lfs*5                    | 40%  | M    |
| 43 | DNMT3A | 2p23.3   | c.2645G>C                                                          | p.R882P                        | 45%  | M    |
| 43 | FLT3   | 13q12.2  | c.1734_1781dupGGTACAGGTGACCGGCTCCTCAG<br>ATAATGAGTACTTCTACGTTGATTT | p.F594insLVQVTG<br>SSDNEYFYVDF | 14%  | m    |
| 44 | STAG2  | Xq25     | c.328C>T                                                           | p.R110*                        | 96%  | M    |
| 44 | CBL    | 11q23.3  | c.1259G>A                                                          | p.R420Q                        | 77%  | M    |
| 44 | DNMT3A | 2p23.3   | c.1627G>T                                                          | p.G543C                        | 50%  | M    |
| 44 | IDH1   | 2q34     | c.394C>T                                                           | p.R132C                        | 49%  | M    |
| 45 | TET2   | 4q24     | c.736dupA                                                          | p.T246Nfs*8                    | 94%  | M    |
| 45 | SRSF2  | 17q25.1  | c.284C>A                                                           | p.P95H                         | 57%  | M    |
| 45 | NPM1   | 5q35.1   | c.860_863dupTCTG                                                   | p.W288Cfs*12                   | 47%  | M    |
| 46 | TET2   | 4q24     | c.3866G>A                                                          | p.C1289Y                       | 83%  | M    |
| 46 | JAK2   | 9p24.1   | c.1849G>T                                                          | p.V617F                        | 35%  | M    |
| 47 | TET2   | 4q24     | c.3782G>A                                                          | p.R1261H                       | 90%  | M    |
| 47 | SRSF2  | 17q25.1  | c.284C>T                                                           | p.P95L                         | 53%  | M    |
| 47 | RUNX1  | 21q22.12 | c.319C>T                                                           | p.R107C                        | 43%  | M    |
| 47 | RUNX1  | 21q22.12 | c.494_497delinsTCTGT                                               | p.G165Vfs*48                   | 39%  | M    |
| 47 | PTPN11 | 12q24.13 | c.181G>T                                                           | p.D61Y                         | 11%  | m    |
| 47 | PTPN11 | 12q24.13 | c.226G>A                                                           | p.E76K                         | 8%   | m    |
| 47 | PTPN11 | 12q24.13 | c.172A>T                                                           | p.N58Y                         | 8%   | m    |
| 48 | TET2   | 4q24     | c.2716_2717delAT                                                   | p.M906Vfs*17                   | 46%  | n.a. |
| 48 | NPM1   | 5q35.1   | c.860_863dupTCTG                                                   | p.W288Cfs*12                   | 35%  | n.a. |
| 49 | CUX1   | 7q22.1   | c.4035G>C                                                          | p.E1345D                       | 48%  | n.a. |
| 49 | TET2   | 4q24     | c.992delT                                                          | p.I331Nfs*16                   | 44%  | n.a. |
| 49 | NPM1-A | 5q35.1   | c.860_863dupTCTG                                                   | p.W288Cfs*12                   | 38%  | n.a. |
| 49 | PHF6   | Xq26.2   | c.454G>T                                                           | p.E152*                        | 20%  | n.a. |
| 49 | GATA2  | 3q21.3   | c.1163T>C                                                          | p.M388T                        | 18%  | n.a. |
| 49 | PHF6   | Xq26.2   | c.480_481delinsTT                                                  | p.K160_K161delins<br>N*        | 8%   | n.a. |
| 50 | IDH2   | 15q26.1  | c.515G>A                                                           | p.R172K                        | 32%  | n.a. |
| 50 | RUNX1  | 21q22.12 | c.568_569insGCCTC                                                  | p.H190Rfs*23                   | 18%  | n.a. |
| 51 | SRSF2  | 17q25.1  | c.284_307delCCCCGGACTCACACCACAGCCGCC                               | p.95_103delPPDSH<br>HSRR       | 35%  | M    |
| 52 | SRSF2  | 17q25.1  | c.284_307delCCCCGGACTCACACCACAGCCGCC                               | p.P95_R102del                  | 15%  | n.a. |
| 52 | CBL    | 11q23.3  | c.1100A>C                                                          | p.Q367P                        | 12%  | n.a. |
| 52 | GATA2  | 3q21.3   | c.488C>T                                                           | p.A163V                        | 11%  | n.a. |
| 52 | CSF3R  | 1p34.3   | c.2395T>C                                                          | p.S799P                        | 10%  | n.a. |
| 53 | RUNX1  | 21q22.12 | c.472T>G                                                           | p.F158V                        | 44%  | M    |
| 53 | SF3B1  | 2q33.1   | c.1986C>A                                                          | p.H662Q                        | 37%  | M    |
| 53 | RUNX1  | 21q22.12 | c.523_528dupCTGACC                                                 | p.L175_T176dup                 | 30%  | M    |
| 53 | FLT3   | 13q12.2  | c.2503G>T                                                          | p.D835Y                        | 18%  | m    |
| 53 | CBL    | 11q23.3  | c.1151G>A                                                          | p.C384Y                        | 8%   | m    |
| 54 | SF3B1  | 2q33.1   | c.1997A>C                                                          | p.K666T                        | 47%  | n.a. |
| 54 | FLT3   | 13q12.2  | c.1784_1804dupGAGAATATGAATATGATCTCA                                | p.K602insREYEYD<br>LK          | 24%  | n.a. |
| 55 | ZRSR2  | Xp22.2   | c.515G>A                                                           | p.C172Y                        | 8%   | M    |
| 56 | RAD21  | 8q24.11  | c.2_3insCCGAGAG                                                    | p.M11fs*12                     | 13%  | M    |
| 57 | FLT3   | 13q12.2  | c.2503G>A                                                          | p.D835N                        | 30%  | M    |
| 58 | n.a.   | n.a.     | n.a.                                                               | n.a.                           | n.a. | n.a. |
| 59 | n.a.   | n.a.     | n.a.                                                               | n.a.                           | n.a. | n.a. |
| 60 | n.a.   | n.a.     | n.a.                                                               | n.a.                           | n.a. | n.a. |

Minor subclone >20% smaller than major clone; n.a., not available

**Supplemental Table S3.** Response rates and overall survival according to the mutation status as indicated.

|                                                     | <b>CR/PR/ALE<br/>n (%)</b> | <b>CR/PR/ALE<br/>vs SD/PD/ED<br/>P-value</b> | <b>Median OS<br/>(months)</b> | <b>P-value</b> |
|-----------------------------------------------------|----------------------------|----------------------------------------------|-------------------------------|----------------|
| <b>&gt;3 mutated genes<br/>(n=18) *</b>             | 9 (53%)                    | -                                            | 3.6                           | -              |
| <b>≤3 mutated genes<br/>(n=27)</b>                  | 12 (44%)                   | 0.76                                         | 4.3                           | 0.74           |
| <b>Minor subclone<br/>(n=9)</b>                     | 5 (56%)                    | -                                            | 2.9                           | -              |
| <b>No minor subclone<br/>(n=24)</b>                 | 10 (42%)                   | 0.70                                         | 5.0                           | 0.05           |
| <b>TP53 mut or<br/>minor subclone<br/>(n=16)</b>    | 8 (50%)                    | -                                            | 2.8                           | -              |
| <b>TP53 wt and<br/>no minor subclone<br/>(n=17)</b> | 7 (41%)                    | 0.73                                         | 5.6                           | 0.01           |
| * In 1 patient best response was not evaluable      |                            |                                              |                               |                |
